# Supplementary material for: Carbon nitride nanosheet-supported CuO for efficient photocatalytic CO2 reduction with 100% CO selectivity
Source: Royal Society of Chemistry journal article supplement (doi:10.1039/d4cc00346b), 2024-01-01
Supplement: d4cc00346b1.pdf [file d4cc00346b1.pdf]

## Supporting Information

# Carbon Nitride nanosheet supported CuO for efficient photocatalytic CO<sub>2</sub> reduction with 100% CO selectivity

Xingxi Lv, Xiaomeng You, Jingyi Pang, Hang Zhou, Zejiang Huang, Ye-Feng Yao, Xue-Lu Wang\*

*Physics Department & Shanghai Key Laboratory of Magnetic Resonance, School of Physics and Electronic Science, East China Normal University, North Zhongshan Road 3663, Shanghai 200062, P. R. China.*

\*Corresponding author' E-mail: [xlwang@phy.ecnu.edu.cn](mailto:xlwang@phy.ecnu.edu.cn)

### Experimental

#### Materials

Melamine, copper nitrate trihydrate (Cu(NO<sub>3</sub>)<sub>2</sub>·3H<sub>2</sub>O), N,N-Dimethylformamide and ethanol were analytical grade and purchased from Sigma–Aldrich. Ultrapure water with a resistivity of 18.2 MU was used for all synthesis and photocatalytic experiments. All chemicals were of analytical grade and used without further purification. High-purity CO<sub>2</sub> (99.999%) was procured from Air Liquide Compressed Gas Co., Ltd. (Shanghai, China).

#### Synthesis of Cu<sub>x</sub>/CN photocatalysts

Melamine (5.0 g) was dispersed in 25 mL ethanol. After continuous agitation, the suspension was transferred to a 50-mL Teflon-lined autoclave and heat-treated in water at 80 °C for 6 h. After cooling to room temperature, a precipitate was obtained via centrifugation, which was subsequently dispersed in 20 mL of ethanol and 5 mL of a copper source (1 M Cu(NO<sub>3</sub>)<sub>2</sub>·3H<sub>2</sub>O ethanol solution) and stirred at 80 °C for 30 min. The resulting mixture was transferred to a 100-mL covered crucible and annealed for 2 h at a heating rate of 15 °C/min and final temperature of 550 °C and cooled to room temperature naturally inside a furnace to obtain brown powder, which was washed with ultra-pure water three times and dried under vacuum at 60 °C for 12 h. The final sample was denoted as Cu<sub>3</sub>/CN. In addition, Cu-supported g-C<sub>3</sub>N<sub>4</sub> photocatalysts with different weight fractions were synthesized at different concentrations of the Cu(NO<sub>3</sub>)<sub>2</sub> ethanol solution (0.14, 0.6, 1.4, and 1.7 M) using the same procedure and named Cu<sub>1</sub>/CN, Cu<sub>2</sub>/CN, Cu<sub>4</sub>/CN, and Cu<sub>5</sub>/CN, respectively.

#### Synthesis of g-C<sub>3</sub>N<sub>4</sub> photocatalyst

Bulk CN was synthesized via the polymerization of melamine (5.0 g) for 2 h at a heating rate of 15 °C/min and final temperature of 550 °C and then naturally cooled to room temperature inside the furnace.

#### Characterizations

The morphologies of the fabricated photocatalysts were observed via transmission electron microscopy (TEM, FEI Tecnai G2 F20) and scanning electron microscopy (SEM, Hitachi S-4800). Crystal-phase identification was performed using powder X-ray diffraction (XRD, Rigaku Ultima IV) with a Cu K $\alpha$  X-ray source in the scanning range of 5–80° and scanning rate of 2° min<sup>-1</sup>. Surface elemental compositions and chemical states of the prepared samples were determined via X-ray photoelectron spectroscopy (XPS, Thermo Fischer ESCALAB Xi<sup>+</sup>). Fourier-transform infrared (FT–IR) spectra of the synthesized samples were recorded using a Thermo Fisher Nicolet Is5 infrared spectrometer in the range of 500–2500 cm<sup>-1</sup> after mixing with KBr. The optical properties of all samples were evaluated through ultraviolet–visible diffusion reflectance spectroscopy (UV–vis DRS, 3010, Hitachi, Japan) in the scanning range of 200–800 nm using BaSO<sub>4</sub> as the reference. Photoluminescence (PL) and time-resolved photoluminescence (TRPL) spectra of

the fabricated samples were recorded using an F-4500 instrument (Hitachi, Japan). Cu concentrations were measured with a Thermo Scientific iCAP RQ inductively coupled plasma mass spectrometer (ICP-MS).

#### **Photo-electrochemical characteristics**

Photoelectrochemical measurements were performed in a conventional three-electrode cell configuration with a 0.5 M Na<sub>2</sub>SO<sub>4</sub> aqueous solution using a CHI660E electrochemical system, in which catalyst-coated fluorine-doped tin oxide (FTO) glass, a Pt plate, and a Ag/AgCl electrode were used as the working, counter, and reference electrodes, respectively. To load a sample film electrode onto FTO glass, 5 mg of the catalyst was added to a solution containing 1 mL of isopropyl alcohol and 20 μL of Nafion. After 1 h of ultrasonication, 100 μL of the obtained solution was dropped onto FTO glass (1 × 1 cm<sup>2</sup>), and the fabricated working electrode was allowed to dry at room temperature. The transient photocurrent response with an on/off switching interval of 20 s was supplied by a 300-W Xe lamp (Beijing Perfectlight Technology Co., China).

#### **In situ FT-IR measurements**

All FT-IR spectra were recorded using a Bruker Tensor II FTIR NEXUS instrument. The as-prepared sample was loaded into the cell, and the entire reaction chamber was purged with Ar for 30 min at 120 °C to blow out all gases inside the cell and species adsorbed on the sample surface. After cooling the reaction cell to room temperature, flows containing CO<sub>2</sub> and H<sub>2</sub>O vapors were introduced into the reactor. The FT-IR spectra were recorded after 40 min of darkness and 70 min of irradiation.

#### **NMR experiments**

DMF (99.9%) and deuterium oxide (D<sub>2</sub>O, 99.9% D containing 0.05 wt.% 3-23 (trimethylsilyl) propionic-2,2,3,3-d<sub>4</sub> acid) were obtained from Sigma-Aldrich. Steps of CEST imaging experiment: 5 mg photocatalyst was dispersed in 10 ml H<sub>2</sub>O and treated under ultrasound for 1 h, 100 mg monosodium glutamate was added with constant stirring to obtain a mixed solution. An appropriate amount of the above solution was loaded into a 5 mm capillary glass tube for testing. Subsequently, high purity CO<sub>2</sub> was passed into the solution for one hour and then tested again. CEST imaging experiments and DOSY NMR experiments were performed on a Bruker AVANCE III 500 MHz spectrometer. The resulting NMR spectra were processed using the Bruker TopSpin software.

#### **Photocatalytic CO<sub>2</sub> reduction activity**

In a typical photocatalytic CO<sub>2</sub> reduction reaction, 1.5 mg of a catalyst, 3 mL of H<sub>2</sub>O, and 30 mL of DMF were added to a gas-closed quartz reactor. After evacuating the reaction system, high-purity CO<sub>2</sub> (99.999%) was supplied to the reactor. The temperature of the reaction system was maintained at approximately 25 °C by recirculating cooling water during irradiation. The light source for photocatalysis was a 300-W Xe lamp (Beijing Perfectlight Technology Co., China). Hydrocarbon fuel products were monitored every 20 min using a GC9790Plus gas chromatograph (Fuli, China) and flame ionization detector. To evaluate the catalyst stability, the system was vacuum-pumped after each cycle and injected with saturated CO<sub>2</sub> before the next cycle.

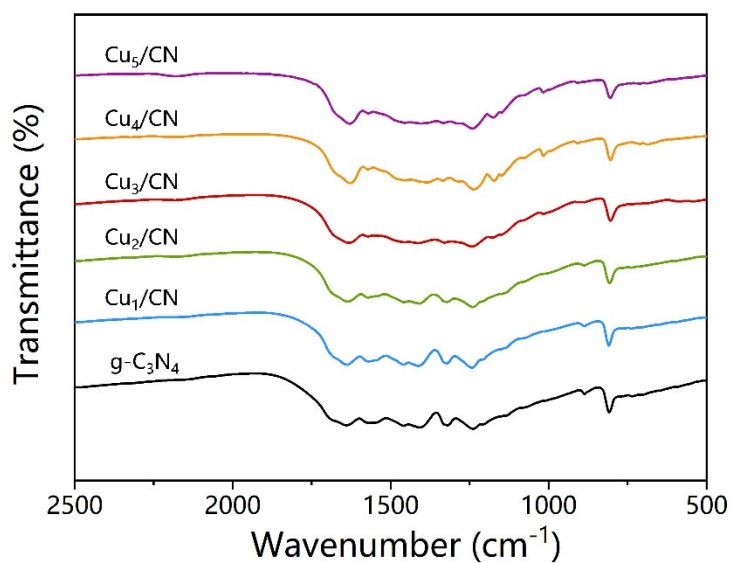

**Figure S1.** FT-IR spectra of g-C<sub>3</sub>N<sub>4</sub> and Cu<sub>x</sub>/CN.

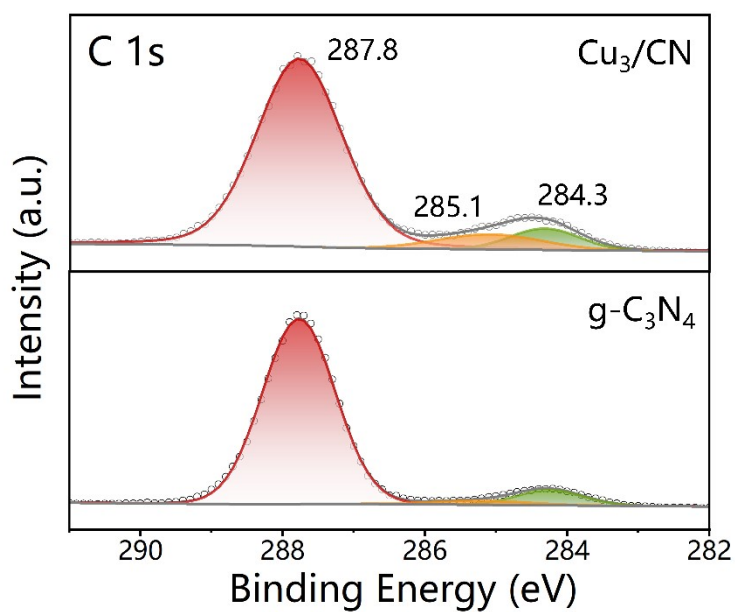

**Figure S2.** High-resolution XPS spectra of C 1s for g-C<sub>3</sub>N<sub>4</sub> and Cu<sub>3</sub>/CN.

The high-resolution C 1s spectrum was deconvoluted into three components with different binding energies (284.3, 285.1, and 287.8 eV), which were related to graphitic C–C bonds, the sp<sup>3</sup>-bonded carbon of C–NH<sub>2</sub>, and the sp<sup>2</sup>-bonded carbons of N–C=N, respectively.

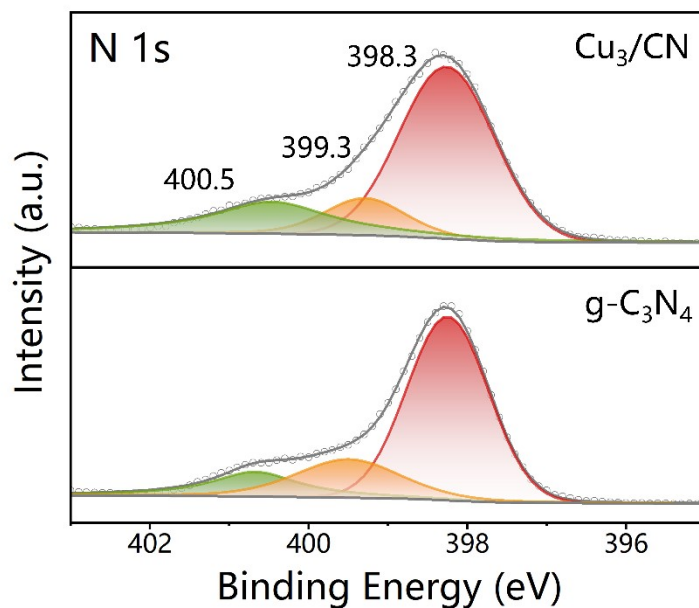

**Figure S3.** High-resolution XPS spectra of N 1s for g-C<sub>3</sub>N<sub>4</sub> and Cu<sub>3</sub>/CN.

The high-resolution N 1s spectrum was deconvoluted into three peaks. The first peak centered at 398.3 eV was assigned to the sp<sup>2</sup>-hybridized nitrogen atoms (C=N–C); the peak located at 399.3 eV belonged to the tertiary nitrogen in N–(C)<sub>3</sub>; and the peak centered at 400.5 eV was due to N–H bonding.

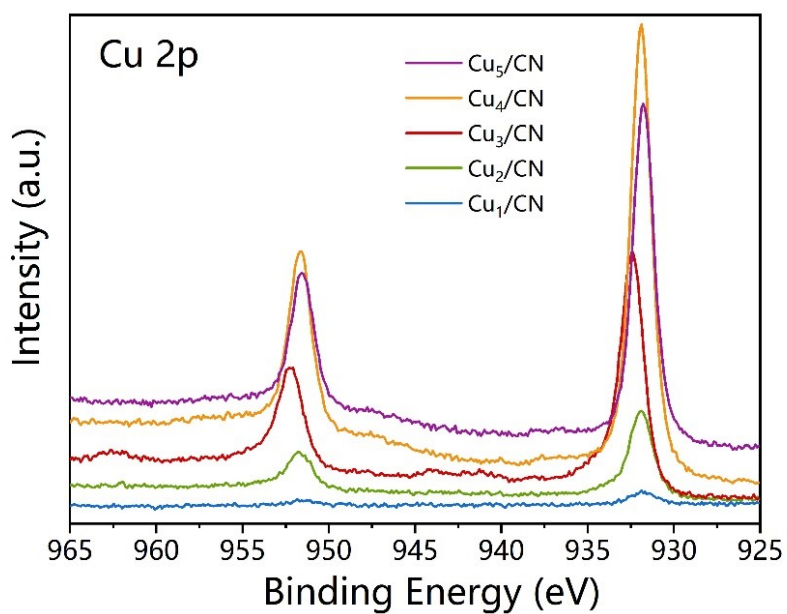

**Figure S4.** High-resolution XPS spectra of Cu 2p for Cu<sub>x</sub>/CN sample.

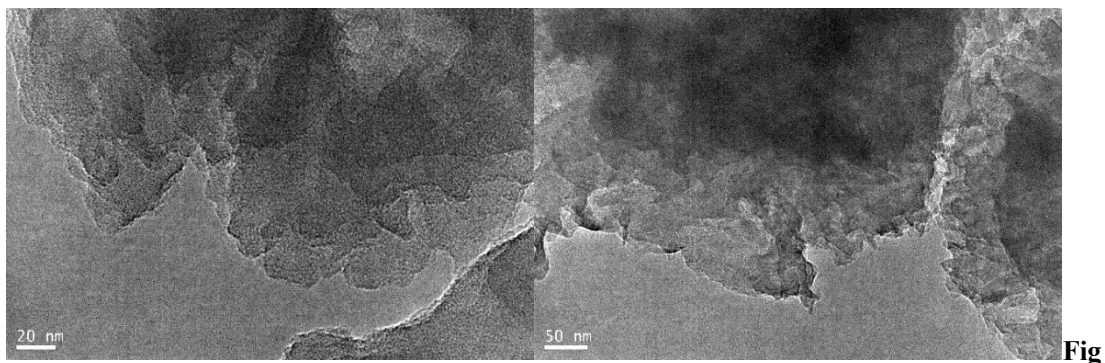

Figure S5. TEM images of g-C<sub>3</sub>N<sub>4</sub>.

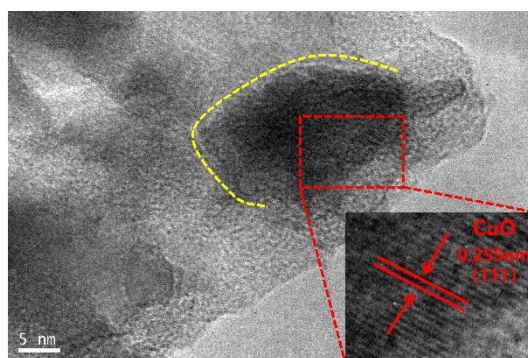

Figure S6. TEM images of Cu<sub>3</sub>/CN.

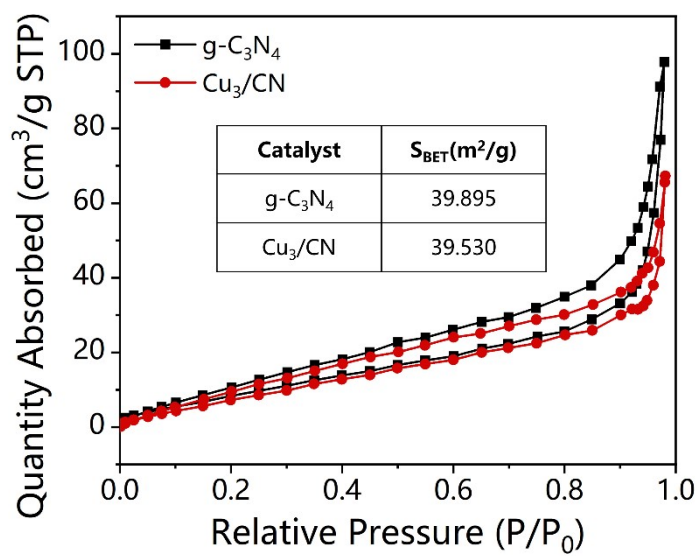

Figure S7. N<sub>2</sub> adsorption–desorption isotherms [Inset: Table of specific surface area].

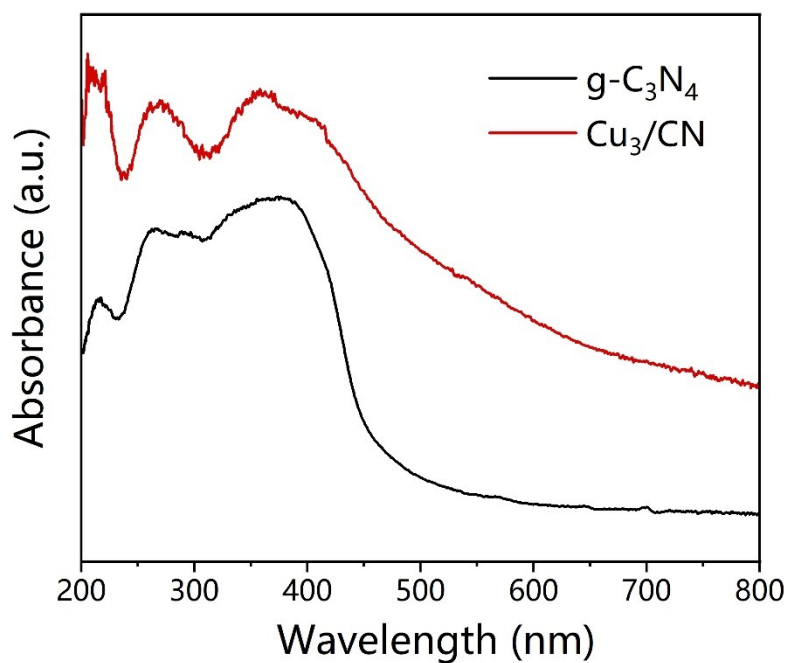

**Figure S8.** UV-vis absorption spectra of g-C<sub>3</sub>N<sub>4</sub> and Cu<sub>3</sub>/CN.

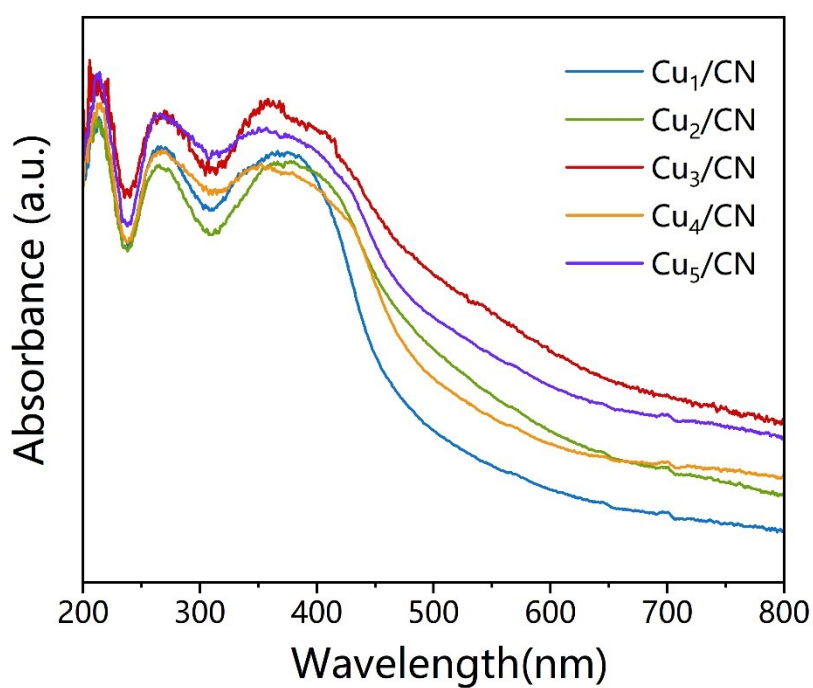

**Figure S9.** UV-vis absorption spectra of Cu<sub>x</sub>/CN.

The pristine g-C<sub>3</sub>N<sub>4</sub> demonstrated excellent visible light absorption at wavelengths lower than 500 nm. Moreover, the optical absorptions of all the Cu<sub>x</sub>/CN photocatalysts are higher than that of the bare g-C<sub>3</sub>N<sub>4</sub> photocatalyst. These results indicate that the Cu<sub>x</sub>/CN photocatalysts possessed enhanced visible-light absorption ability, which promoted the generation of electron-hole pairs.

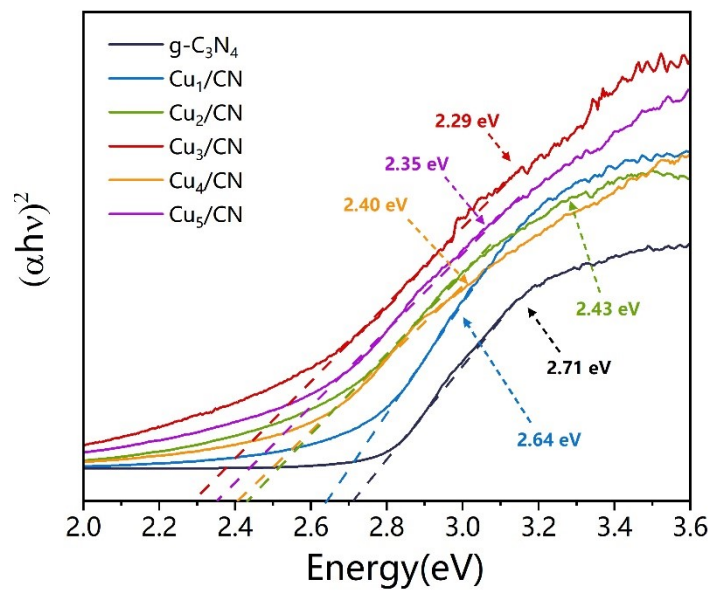

**Figure S10.** The plots of  $(\alpha hv)^2$  versus  $hv$  of  $g\text{-C}_3\text{N}_4$  and  $\text{Cu}_x/\text{CN}$ .

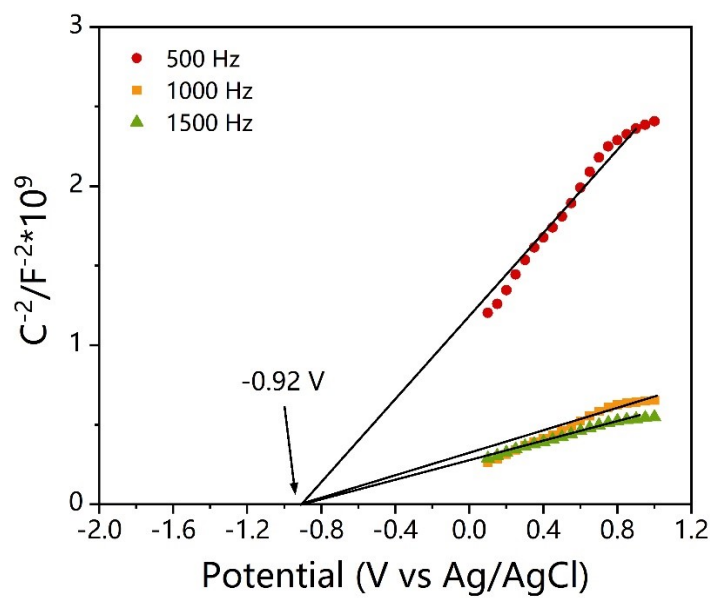

**Figure S11.** Mott-Schottky plots of  $g\text{-C}_3\text{N}_4$ .

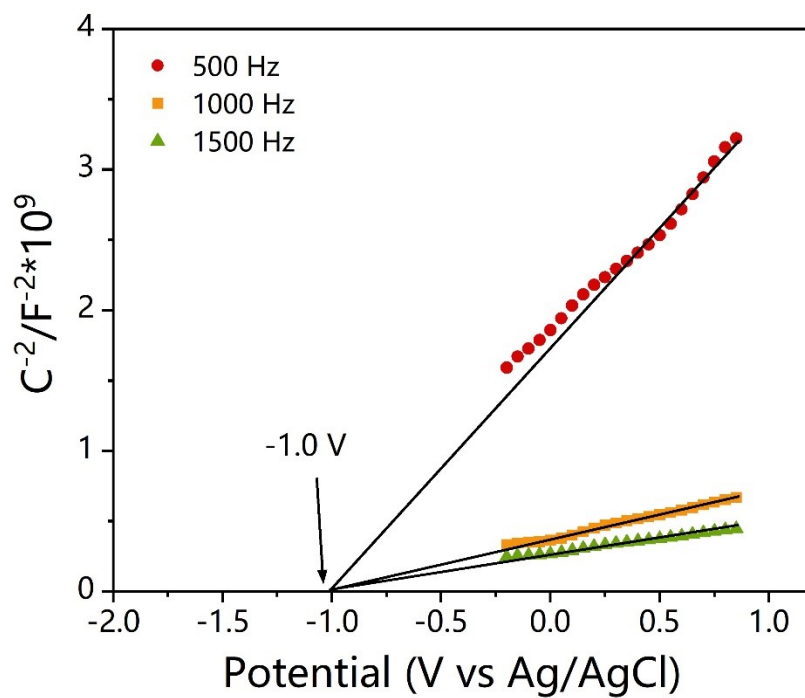

Figure S12. Mott-Schottky plots of  $\text{Cu}_3/\text{CN}$ .

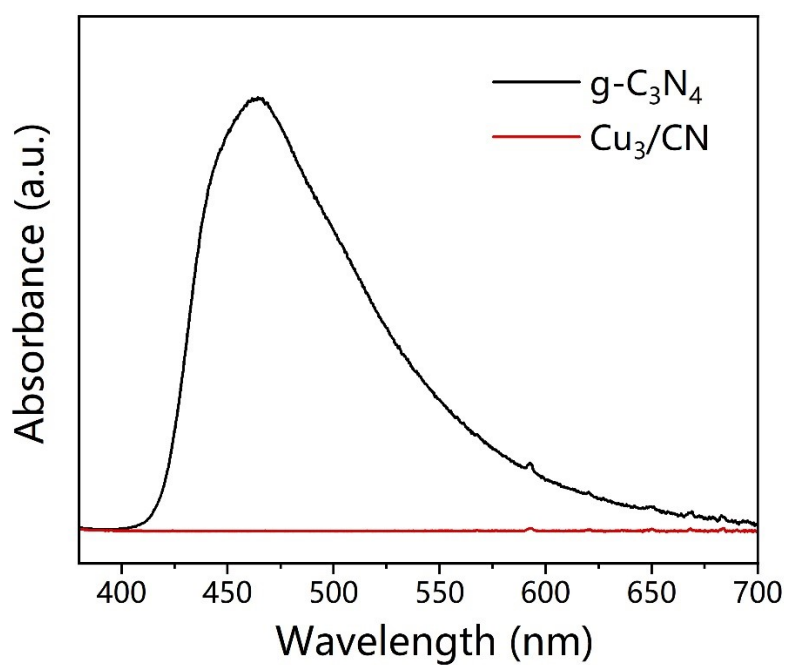

Figure S13. PL spectra of  $\text{g-C}_3\text{N}_4$  and  $\text{Cu}_3/\text{CN}$ .



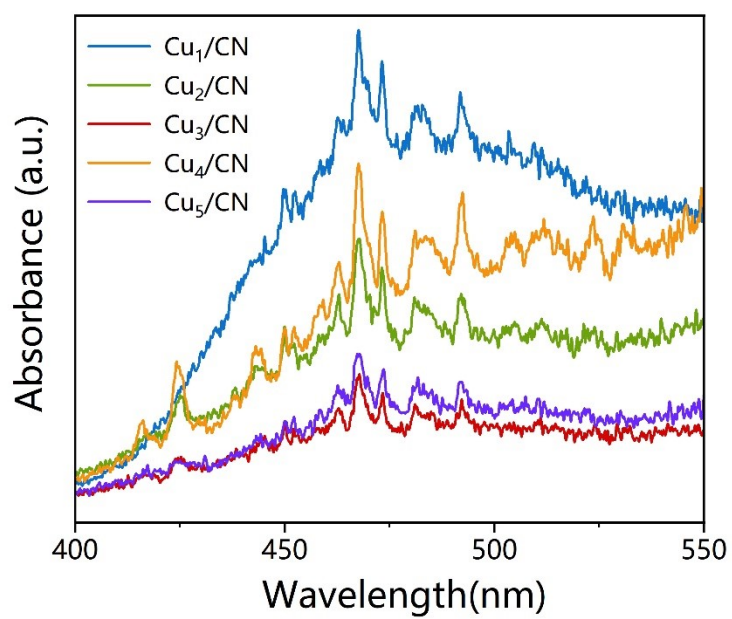

Figure S14. PL spectra of Cu<sub>x</sub>/CN sample.

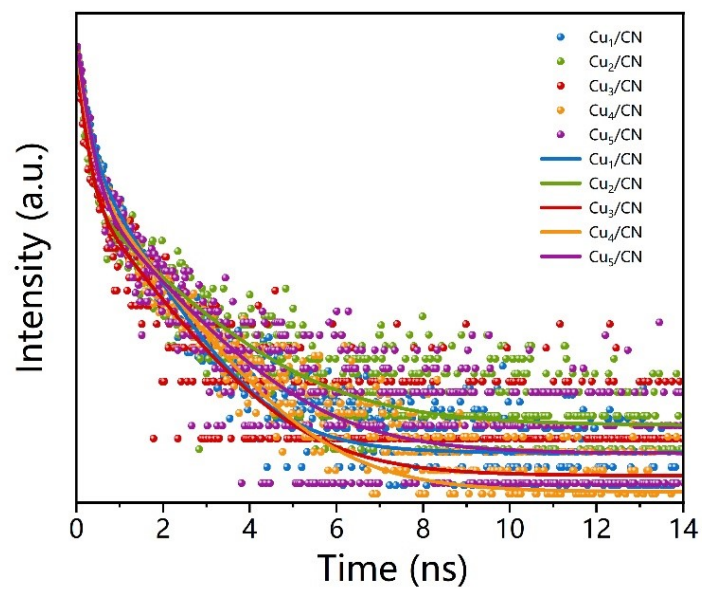

Figure S15. Time-resolved photoluminescence (TRPL) spectra.

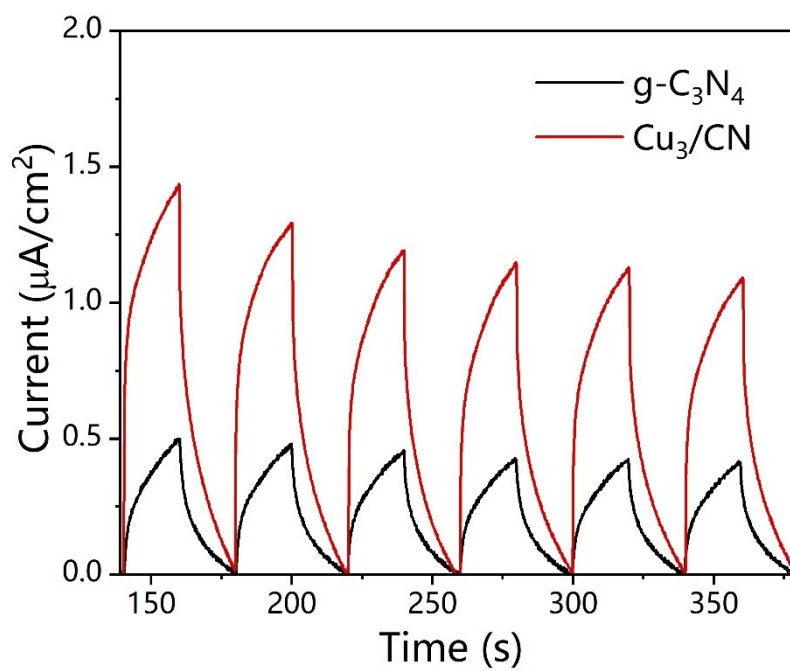

**Figure S16.** Photocurrent response spectra of  $g\text{-C}_3\text{N}_4$  and  $\text{Cu}_3/\text{CN}$ .

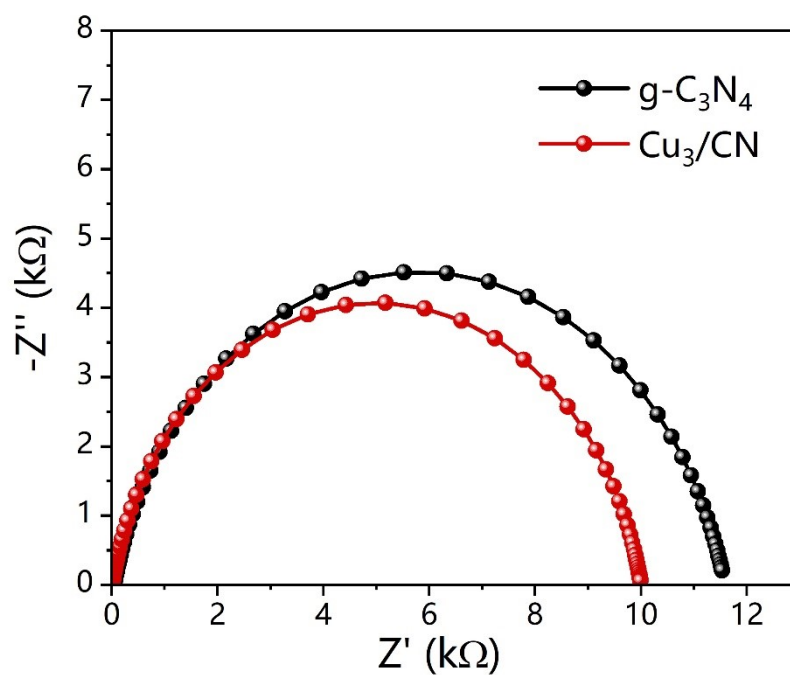

**Figure S17.** Electrochemical impedance spectra of  $g\text{-C}_3\text{N}_4$  and  $\text{Cu}_3/\text{CN}$ .

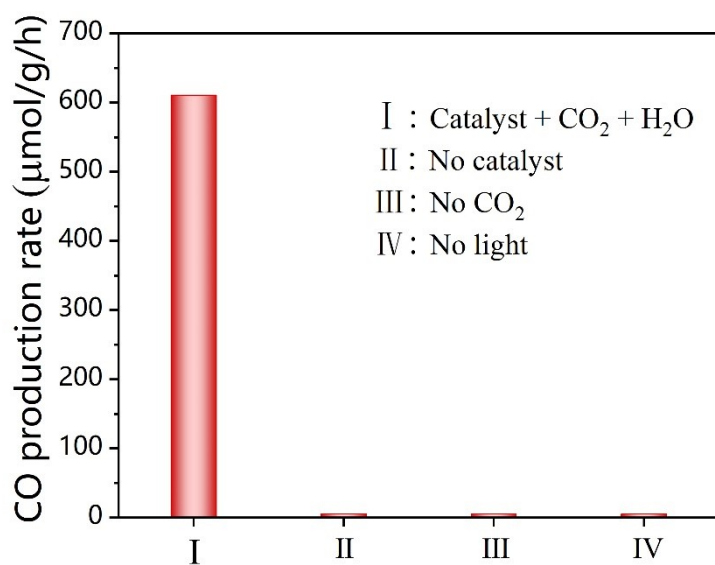

**Figure S18.** Control experiments of photocatalytic  $\text{CO}_2$  reduction performance over  $\text{Cu}_3/\text{CN}$ .

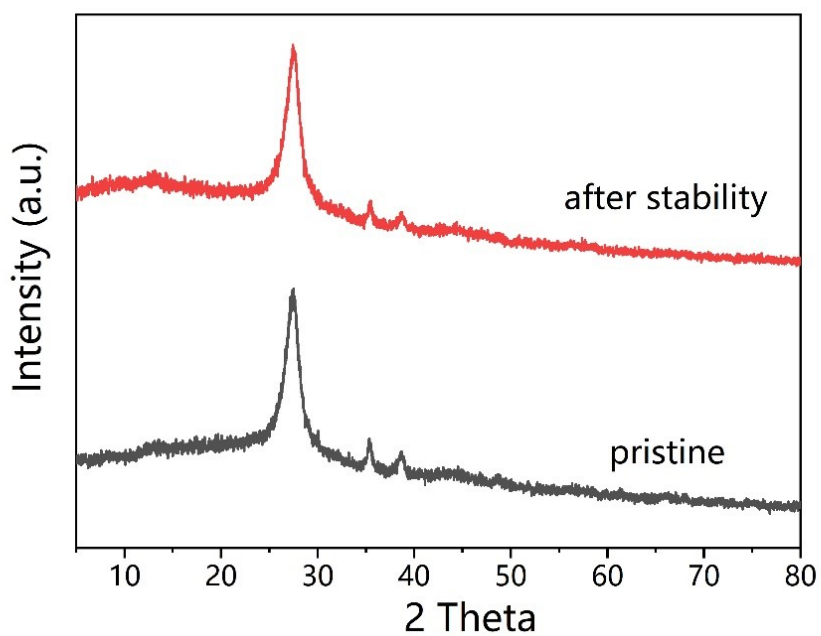

**Figure S19.** XRD pattern of the used  $\text{Cu}_3/\text{CN}$ .

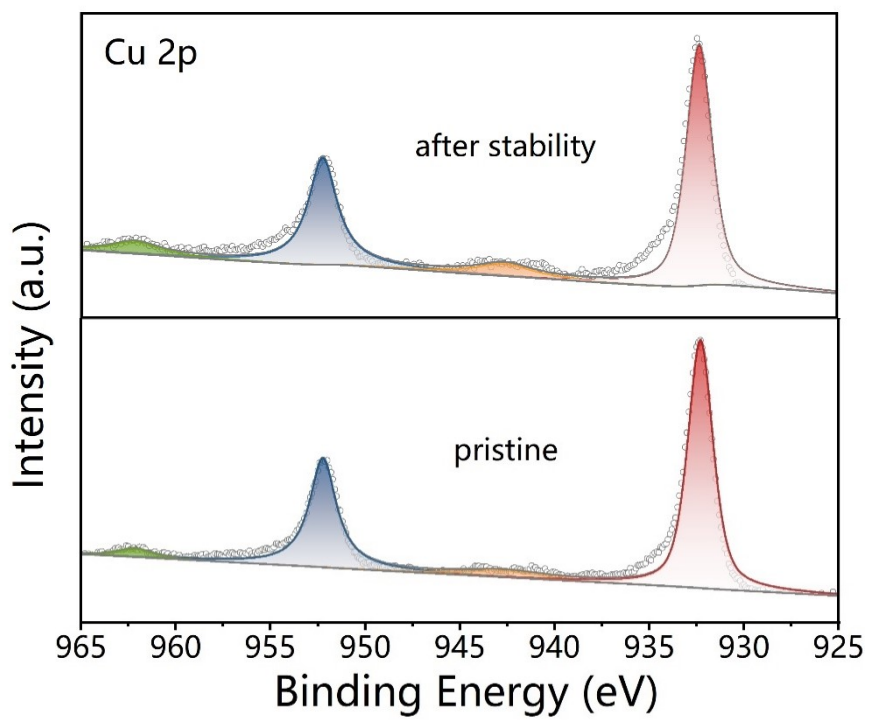

**Figure S20.** XPS of Cu 2p for the used Cu<sub>3</sub>/CN.

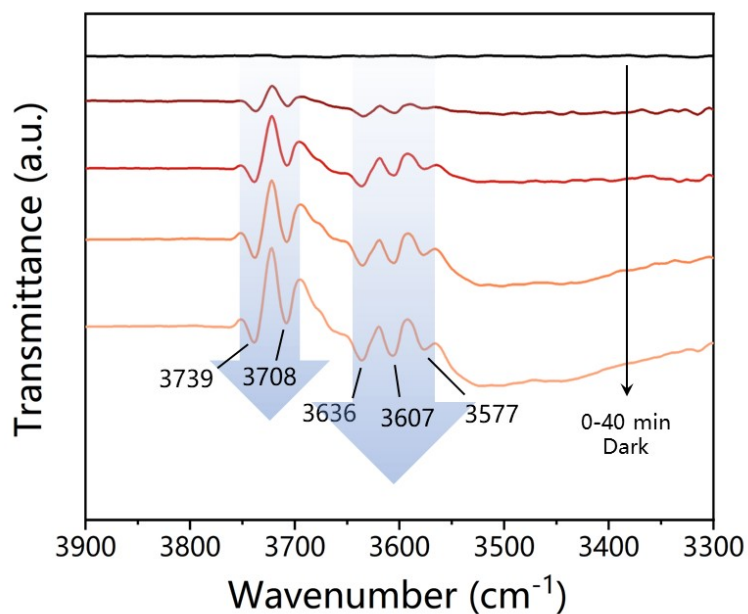

**Figure S21.** In situ DRIFTS test for CO<sub>2</sub> and H<sub>2</sub>O interaction with Cu<sub>3</sub>/CN in dark.

The peaks at 1672 and 1650 cm<sup>-1</sup> are attributed to active  $\cdot\text{CO}_2^-$  intermediates, while the peak at 1510 cm<sup>-1</sup> is due to the characteristic vibrations of monodentate carbonates ( $\text{m-CO}_3^{2-}$ ). The formation of bidentate carbonate ions ( $\text{b-CO}_3^{2-}$ ) is confirmed by the peaks at 1541, 1377, and 1154 cm<sup>-1</sup>. The absorption bands near 1635 and 1438 cm<sup>-1</sup> correspond to bicarbonate  $\text{HCO}_3^-$  species, which originate from the surface-bound interactions between the adsorbed CO<sub>2</sub> and Cu<sub>3</sub>/CN and are considered important intermediates. Figure 4b and S18 show the characteristic CO<sub>2</sub> adsorption bands with peaks centered at 3739–3577, 2362, and 2336 cm<sup>-1</sup>, whose intensities indicate the CO<sub>2</sub> adsorption capacity of Cu<sub>3</sub>/CN.

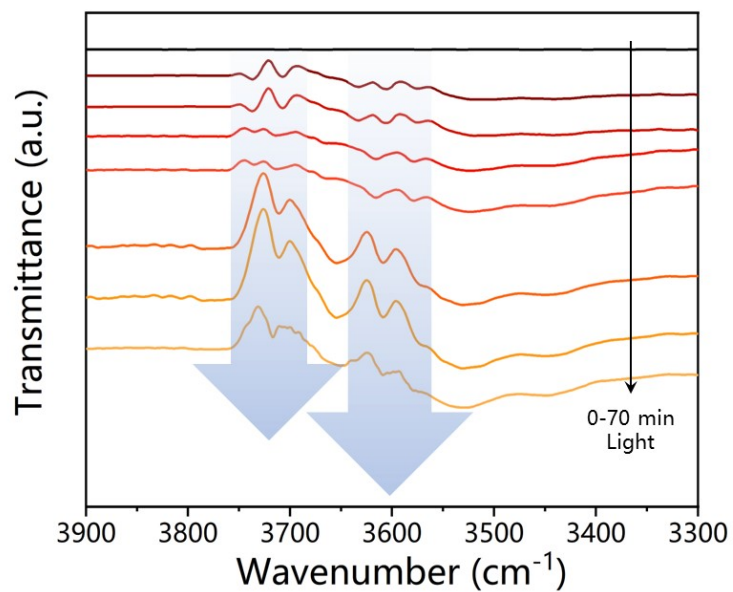

**Figure S22.** In situ DRIFTS test for CO<sub>2</sub> and H<sub>2</sub>O interaction with Cu<sub>3</sub>/CN under subsequently light irradiation.

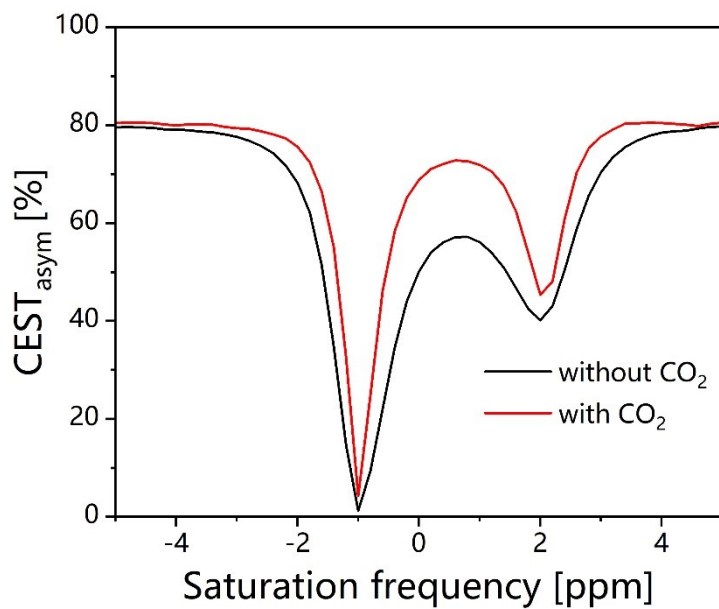

**Figure S23.** Z-spectra of g-C<sub>3</sub>N<sub>4</sub> catalyst aqueous solution at different pH.

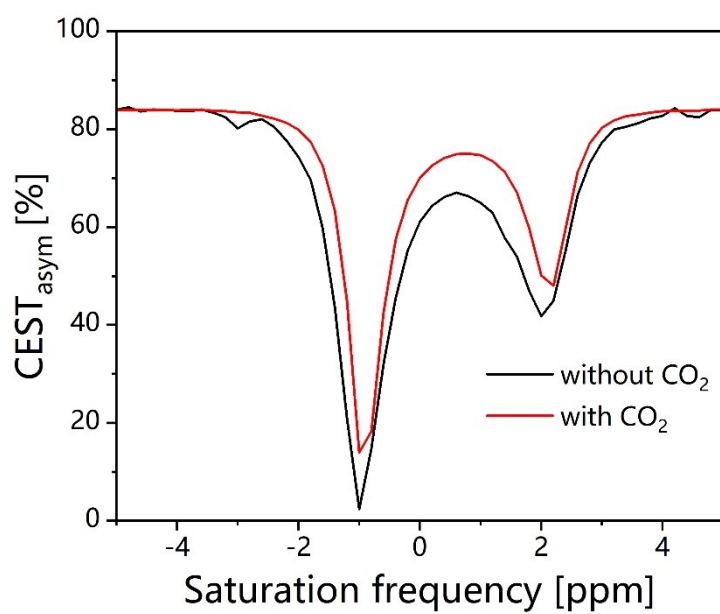

**Figure S24.** Z-spectra of  $\text{Cu}_3/\text{CN}$  catalyst aqueous solution at different pH.

**Table S1.** Copper content of Cu<sub>x</sub>/CN.

|                     | Weighing mass (g) | Constant volume (mL) | The measured concentration of Cu (μg/mL) | Cu final concentration (%) |
|---------------------|-------------------|----------------------|------------------------------------------|----------------------------|
| Cu <sub>1</sub> /CN | 0.0530            | 50                   | 20.40                                    | 1.92                       |
| Cu <sub>2</sub> /CN | 0.0473            | 50                   | 73.20                                    | 7.74                       |
| Cu <sub>3</sub> /CN | 0.0591            | 50                   | 168.90                                   | 14.29                      |
| Cu <sub>4</sub> /CN | 0.0526            | 50                   | 212.00                                   | 20.15                      |
| Cu <sub>5</sub> /CN | 0.0480            | 50                   | 208.40                                   | 21.71                      |

**Table S2.** Fluorescence lifetime and average lifetime results for different samples.

| Samples                         | $\tau_1$ (ns) | A <sub>1</sub> | $\tau_1$ (ns) | A <sub>2</sub> | $\tau_{ave}$ (ns) |
|---------------------------------|---------------|----------------|---------------|----------------|-------------------|
| g-C <sub>3</sub> N <sub>4</sub> | 0.71          | 0.59           | 3.12          | 0.42           | 2.54              |
| Cu <sub>1</sub> /CN             | 0.20          | 0.75           | 1.13          | 0.29           | 0.84              |
| Cu <sub>2</sub> /CN             | 0.16          | 0.81           | 1.78          | 0.16           | 1.27              |
| Cu <sub>3</sub> /CN             | 0.17          | 0.69           | 1.39          | 0.17           | 0.99              |
| Cu <sub>4</sub> /CN             | 0.20          | 0.78           | 1.40          | 0.22           | 1.00              |
| Cu <sub>5</sub> /CN             | 0.21          | 0.90           | 1.58          | 0.18           | 1.03              |



**Table S3.** Comparison of photocatalytic reduction of CO<sub>2</sub> reaction performance of CuO/g-C<sub>3</sub>N<sub>4</sub> system.

| <b>Composite</b>                                     | <b>Reaction medium</b>          | <b>Light source</b>                             | <b>Activity</b>                                                                                                                                  | <b>Reference</b> |
|------------------------------------------------------|---------------------------------|-------------------------------------------------|--------------------------------------------------------------------------------------------------------------------------------------------------|------------------|
| CuO/g-C <sub>3</sub> N <sub>4</sub>                  | H <sub>2</sub> O                | 300 W Xenon lamp<br>(300 < $\lambda$ < 1100 nm) | CO: 3.7855<br>( $\mu\text{mol g}^{-1}$ )                                                                                                         | 1                |
| g-C <sub>3</sub> N <sub>4</sub> /CuO@<br>MIL-125(Ti) | H <sub>2</sub> O                | 300 W Xenon lamp<br>( $\lambda = 420$ nm)       | CO: 180.1<br>CH <sub>3</sub> OH: 997.2<br>CH <sub>3</sub> CHO: 531.5<br>CH <sub>3</sub> CH <sub>2</sub> OH: 1505.7<br>( $\mu\text{mol g}^{-1}$ ) | 2                |
| CuO@SrCN                                             | H <sub>2</sub> O                | 300 W Xenon lamp<br>(200 < $\lambda$ < 1100 nm) | CO: 1.87<br>( $\mu\text{mol g}^{-1}\text{h}^{-1}$ )                                                                                              | 3                |
| CuO/g-C <sub>3</sub> N <sub>4</sub>                  | MECN,<br>TEOA, H <sub>2</sub> O | 3000 W Xenon lamp                               | CO: 5.38<br>CH <sub>4</sub> : 18.61<br>( $\mu\text{mol g}^{-1}\text{h}^{-1}$ )                                                                   | 4                |
| CuO/g-C <sub>3</sub> N <sub>4</sub>                  | DMF, H <sub>2</sub> O           | 300 W Xenon lamp                                | CO: 610.57<br>( $\mu\text{mol g}^{-1}\text{h}^{-1}$ )                                                                                            | This work        |

## References

1. M. Li, Y. Wu, E. Gu, W. Song and D. Zeng, *Journal of Alloys and Compounds*, 2022, **914**, 165339.
2. N. Li, X. Liu, J. Zhou, W. Chen and M. Liu, *Chemical Engineering Journal*, 2020, **399**, 125782.
3. A. Raza, A. A. Haidry, Z. Yao, M. F. Saleem, A. A. Alothman and S. Mohammad, *Chemical Engineering Journal*, 2024, **480**, 148162.
4. B. Yang, Y. Li, X. Yang, D. Wang, Z. Wang, E. Han and Y. He, *Solid State Sciences*, 2023, **144**, 107304.
